# Supplementary material for: Effect of graphene between photoanode and sensitizer on the intramolecular and intermolecular electron transfer process
Source: Royal Society of Chemistry journal article supplement (doi:10.1039/c9cp06543a), 2020-01-01
Supplement: c9cp06543a1.pdf [file c9cp06543a1.pdf]

## **Effect of graphene between photoanode and sensitizer on the intramolecular and intermolecular electron transfer process**

Xiaofei Wang<sup>[a]</sup>, Yuanzuo Li\*<sup>[a]</sup>, Peng Song<sup>[b]</sup>, Fengcai Ma<sup>[b]</sup>, Yanhui Yang\*<sup>[c]</sup>,

*<sup>a</sup>College of Science, Northeast Forestry University, Harbin 150040, Heilongjiang, China*

*<sup>b</sup>Department of Physics, Liaoning University, Shenyang 110036, Liaoning, China*

*<sup>c</sup>Institute of Advanced Synthesis, School of Chemistry and Molecular Engineering, Jiangsu National Synergetic Innovation Center for Advanced Materials, Nanjing Tech University, 211816 Nanjing, China*

-----  
Corresponding author:

Tel.: +86 451 82192245 8211; E-mail: yzli@nefu.edu.cn, Yhyang@njtech.edu.cn

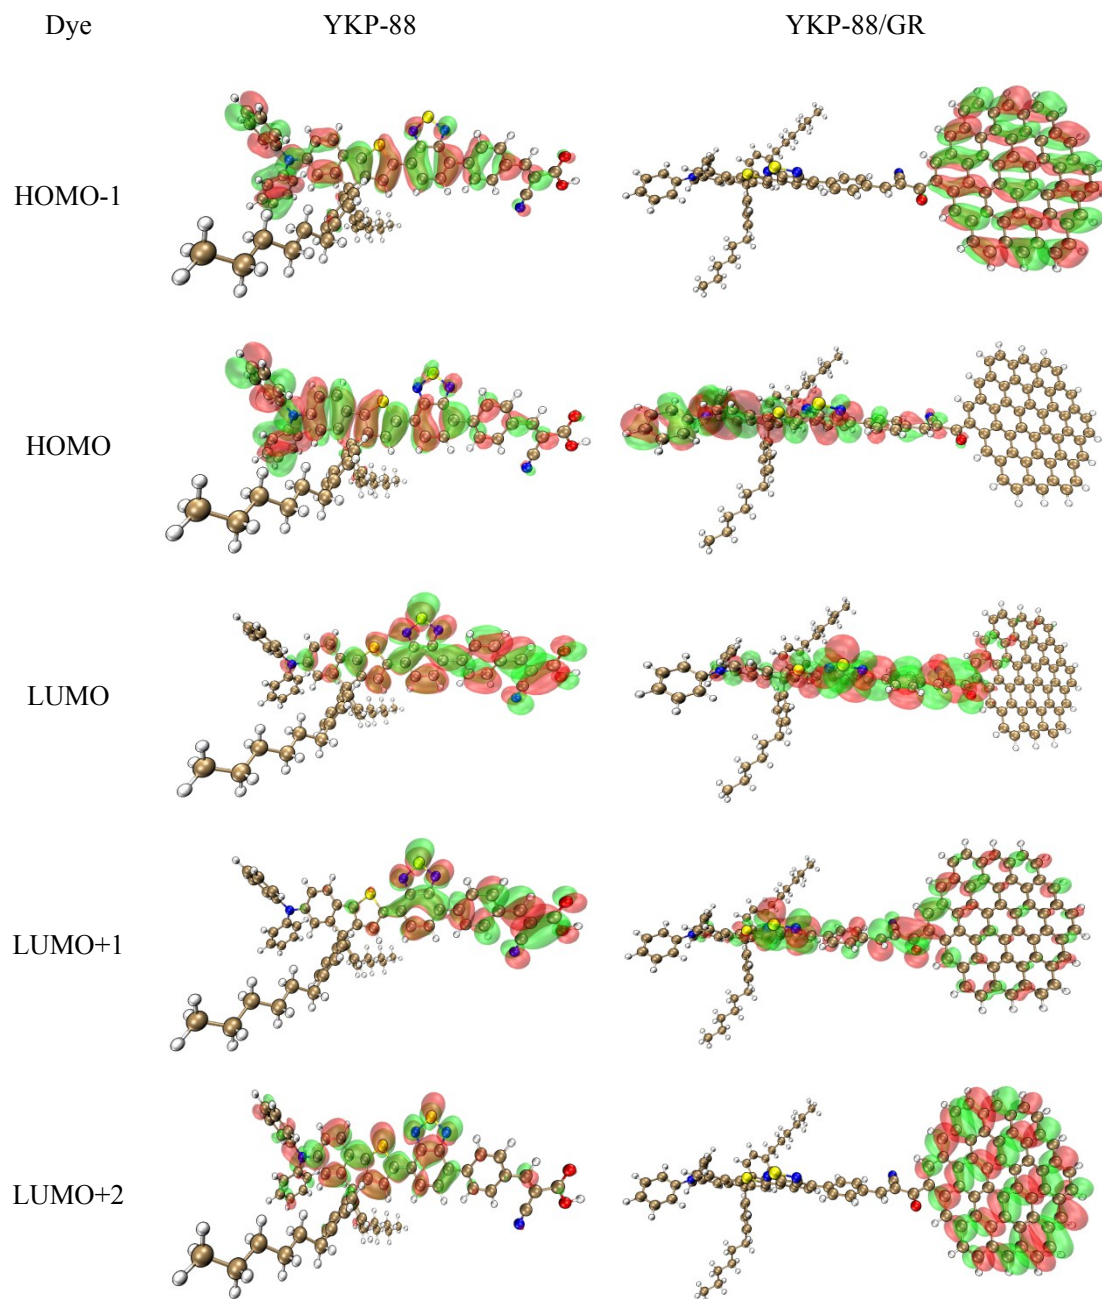

**Figure S1** Frontier molecular orbitals of YKP-88 and YKP-88/GR.

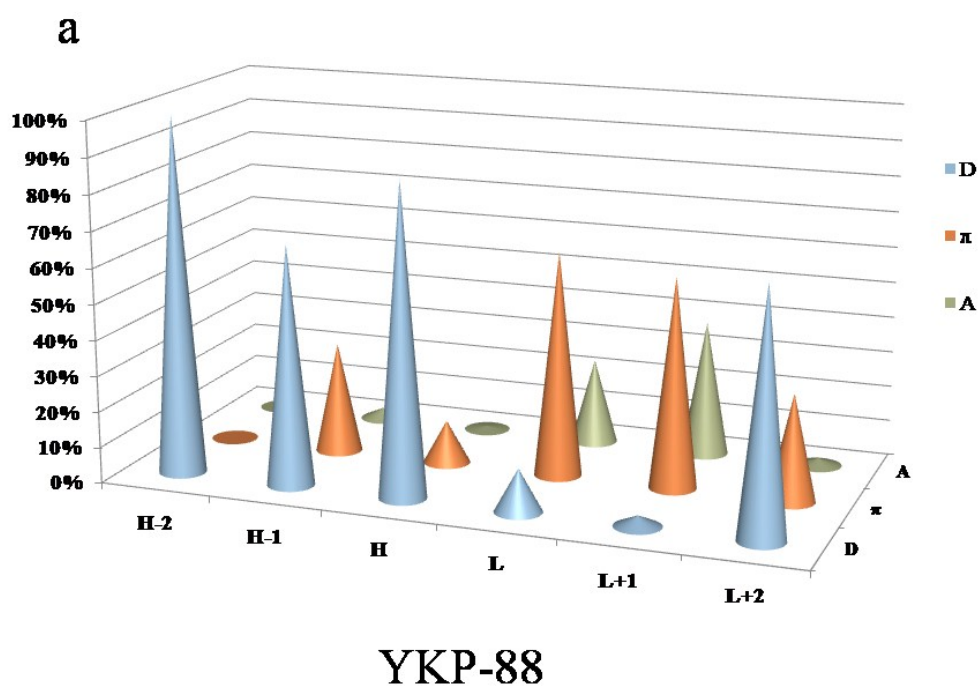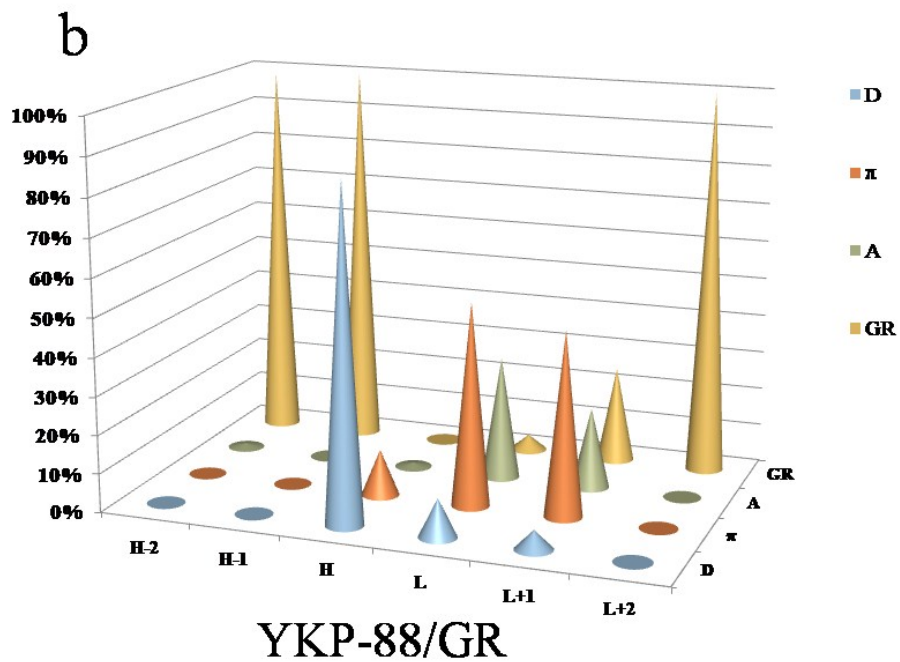

**Figure S2** Electron density proportion of the individual groups in occupied orbitals (HOMO-2, HOMO-1, HOMO, LUMO, LUMO+1 and LUMO+2 ) of the dye and its graphene complexes (a represents dye; b represents its graphene complexes).

YKP-88@(TiO<sub>2</sub>)<sub>16</sub>

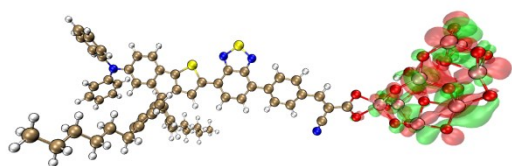

LUMO+5

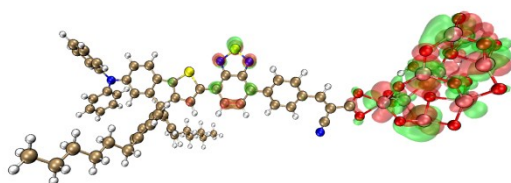

LUMO+7

YKP-88/GR@(TiO<sub>2</sub>)<sub>16</sub>

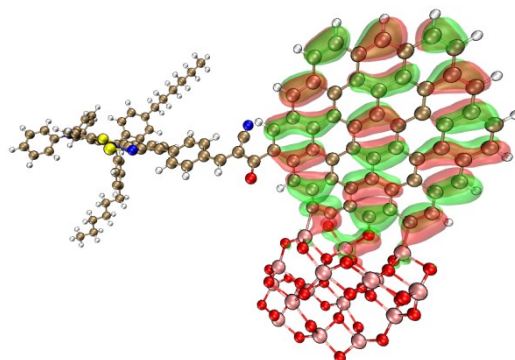

HOMO-2

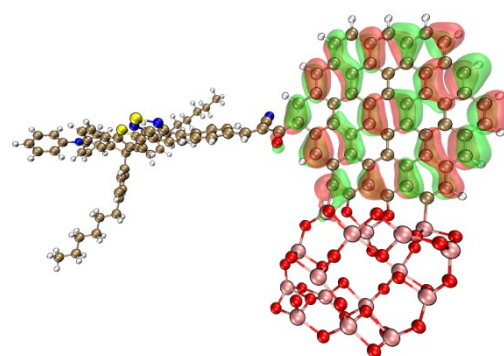

HOMO-1

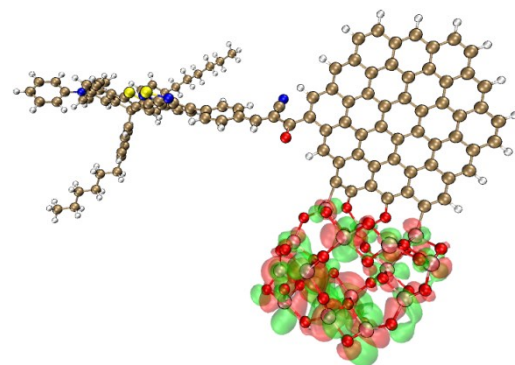

LUMO+3

**Figure S3** Frontier molecular orbitals of YKP-88@(TiO<sub>2</sub>)<sub>16</sub> and YKP-88/GR@(TiO<sub>2</sub>)<sub>16</sub>.

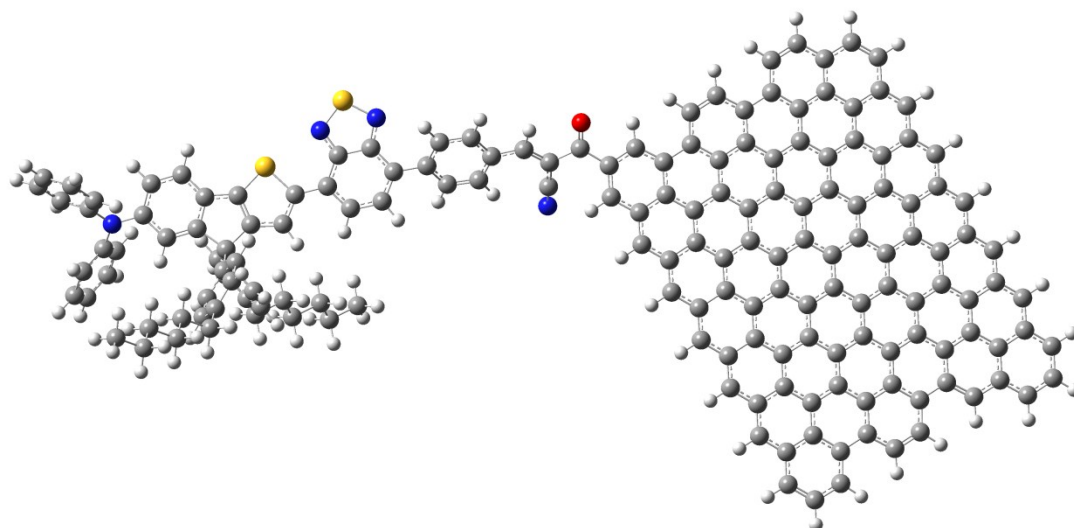

**Figure S4** Geometrical structure of YKP-88@GR.
